# Supplementary material
Source: Springer Nature journal article supplement (https://www.springermedizin.de/resource/supplementary/12876_2011_777_MOESM10_ESM.pdf/9437764)

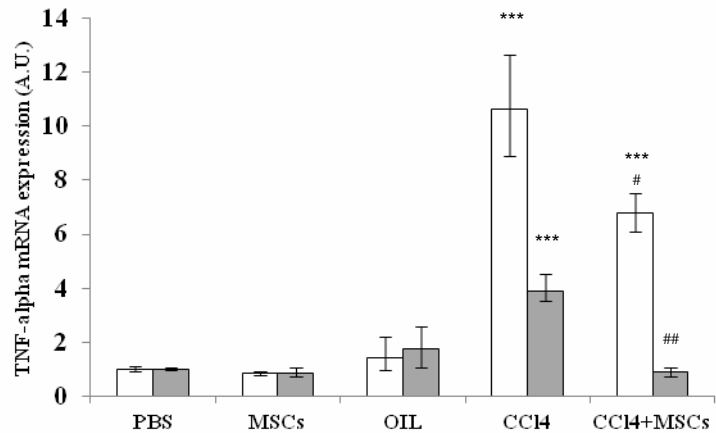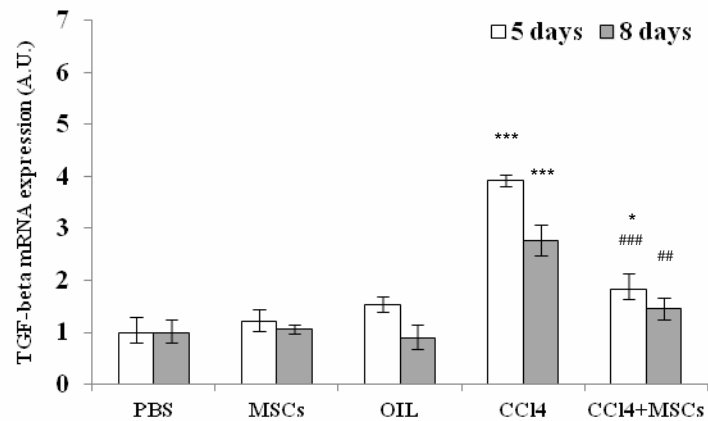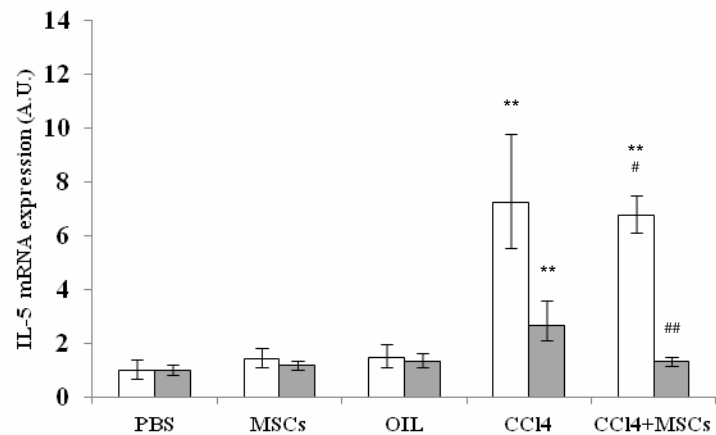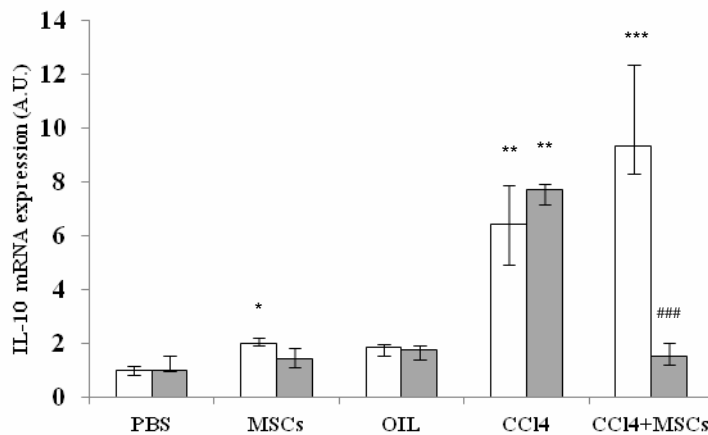

Supplement: MOESM10 [file 9437764]
